# Supplementary material for: N-Doped Graphene with Low Intrinsic Defect Densities via a Solid Source Doping Technique
Source: Nanomaterials (Basel). 2017 Sep 30;7(10):302. doi: 10.3390/nano7100302 (PMC5666467; doi:10.3390/nano7100302)
Supplement: Supplementary file 1 [file nanomaterials-07-00302-s001.pdf]

# N-doped Graphene with Low Intrinsic Defect Densities via a Solid Source Doping Technique

Bo Liu <sup>1,2,†</sup>, Chia-Ming Yang <sup>2,3,4,5,†</sup>, Zhiwei Liu <sup>1</sup> and Chao-Sung Lai <sup>2,4,6,7,\*</sup>

<sup>1</sup> State Key Laboratory of Electronic Thin Films and Integrate Devices, University of Electronic Science and Technology of China, Chengdu 610054, China; ziv\_liu@hotmail.com

<sup>2</sup> Department of Electronic Engineering, Chang Gung University, Taoyuan, 33302, Taiwan; doctorliu8963@gmail.com (B.L.); cmyang@mail.cgu.edu.tw (C.-M.Y.)

<sup>3</sup> Institute of Electro-Optical Engineering, Chang Gung University, Taoyuan, 33302, Taiwan

<sup>4</sup> Biosensor Group, Biomedical Engineering Research Center, Chang Gung University, Taoyuan, 33302, Taiwan

<sup>5</sup> Department of General Surgery, Chang Gung Memorial Hospital, Linkou, 33305, Taiwan

<sup>6</sup> Department of Nephrology, Chang Gung Memorial Hospital, Linkou, 33305, Taiwan

<sup>7</sup> Department of Materials Engineering, Ming Chi University of Technology, New Taipei city, 24301, Taiwan

\* Correspondence: cslai@mail.cgu.edu.tw; Tel.: +886(03)2118800#5751

† These authors contributed equally to this work.

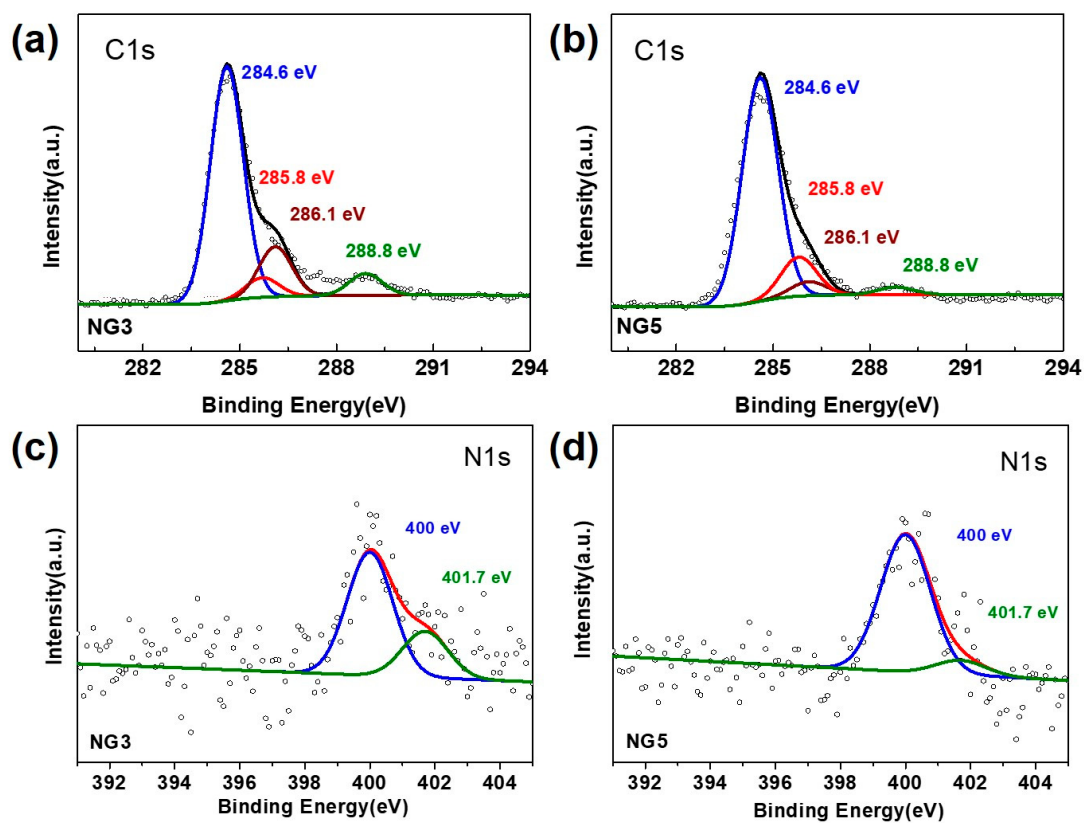

**Figure S1.** XPS spectra for N-doped graphene. (a-b) *C1s* core level for NG3 and NG5; (c) *N1s* core level for NG3 and NG5.

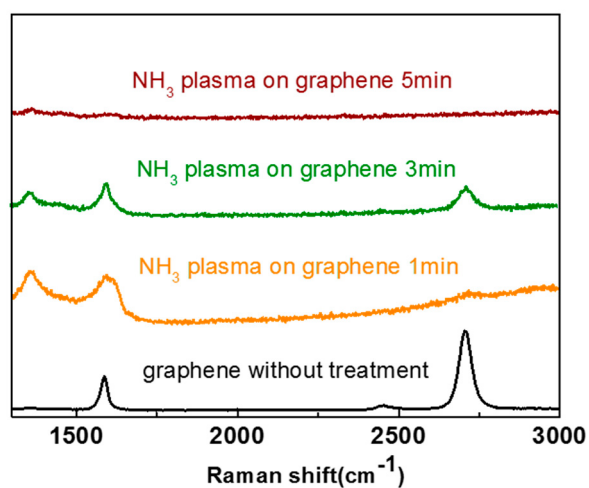

**Figure S2.** Raman spectrum of graphene without and with a 1 min, 3 min, and 5 min NH<sub>3</sub> plasma treatment.

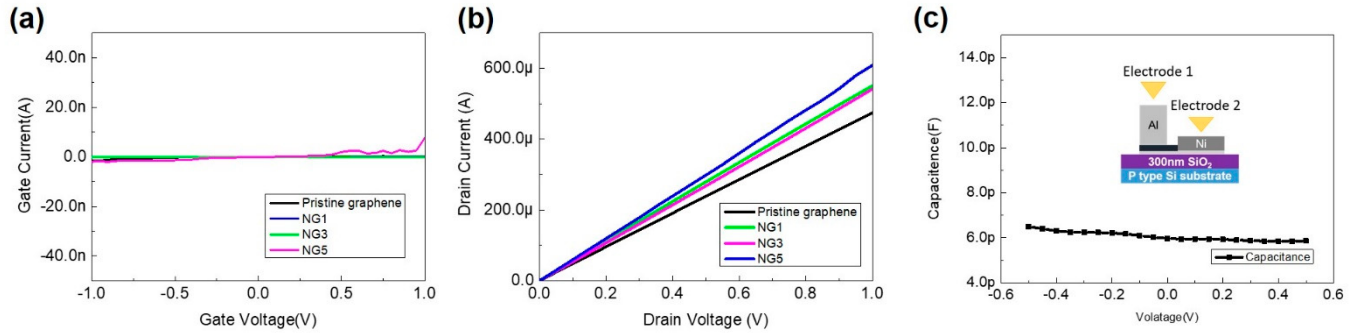

**Figure S3.** (a) The  $I_g/V_g$  output characteristic curve of pristine graphene and N-doped graphene; (b) the  $I_d/V_d$  curve of pristine graphene and N-doped graphene; (c) gate capacitance of pristine graphene and N-doped graphene, the inset illustration shows the structure of the capacitance measurement.
